# Supplementary material for: Highly labile cationic tris-acetonitrile complexes, [TpRM(NCMe)3]OTf (M = Ni, Co; TpR: hydrotrispyrazolylborato, R = Ph, Me and iPr2): versatile precursors for TpR-containing nickel and cobalt complexes
Source: Royal Society of Chemistry journal article supplement (doi:10.1039/b203377c), 2002-01-01
Supplement: b203377c-1.pdf [file b203377c-1.pdf]

## Details of X-ray crystallography

Singles crystals were mounted on glass fibers.

Diffraction measurements were made on a Rigaku RAXIS IV imaging plate area detector with Mo K radiation ( $\lambda = 0.71069 \text{ \AA}$ ). Indexing was performed from 2 oscillation images, which were exposed for 5 min. The crystal-to-detector distance was 110 mm. Data collection parameters were as follows: the oscillation range / the number of oscillation images / the exposed time:  $6.0^\circ / 21 / 600 \text{ sec / deg}$  (**2<sup>Ni</sup>**);  $6.0^\circ / 16 / 800 \text{ sec / deg}$  (**2<sup>Co</sup>**);  $6.0^\circ / 20 / 600 \text{ sec / deg}$  (**2<sup>Co</sup>-THF**);  $5.0^\circ / 36 / 450 \text{ sec / deg}$  (**3**);  $4.5^\circ / 40 / 350 \text{ sec / deg}$  (**5<sup>Ni</sup>**);  $5.0^\circ / 36 / 350 \text{ sec / deg}$  (**6**);  $5.0^\circ / 36 / 300 \text{ sec / deg}$  (**7**);  $2.0^\circ / 90 / 360 \text{ sec / deg}$  (**8**);  $5.0^\circ / 36 / 400 \text{ sec / deg}$  (**9**);  $3.0^\circ / 60 / 250 \text{ sec / deg}$  (**10**);  $5.0^\circ / 36 / 250 \text{ sec / deg}$  (**11<sup>Ni</sup>**);  $5.0^\circ / 36 / 400 \text{ sec / deg}$  (**12<sup>Ni</sup>**);  $5.0^\circ / 36 / 240 \text{ sec / deg}$  (**14a**);  $3.0^\circ / 60 / 300 \text{ sec / deg}$  (**14b**);  $5.0^\circ / 28 / 600 \text{ sec / deg}$  (Tp<sup>Ph,Me</sup>Co-OTf). Readout was performed with the pixel size of  $100 \mu\text{m} \times 100 \mu\text{m}$ . Neutral scattering factors were obtained from the standard source. In the reduction of data, Lorentz and polarization corrections and empirical absorption corrections were made.<sup>1</sup> Crystallographic data and results of structure refinements are listed in Table S4.

Diffraction measurements of **2<sup>Ni</sup>-THF**, **4**, **11<sup>Co</sup>**, and **12<sup>Co</sup>** were made on a Rigaku AFC7R automated four-circle diffractometers by using graphite-monochromated Mo K radiation ( $\lambda = 0.71069 \text{ \AA}$ ). The unit cell was determined and refined by a least-squares method using 20 independent reflections ( $2^\circ \sim 20^\circ$ ). Data were collected with  $\omega$ -2 $\theta$  scan techniques. If  $(I/I_0)$  was more than 0.1, a scan was repeated up to three times and the results were added to the first scan. Three standard reflections were monitored at every 150 measurements. The data processing (data collection) was performed on a VENTRIS FX 5133 computer. In the reduction of data, Lorentz and polarization corrections were made. An empirical absorption correction ( $\omega$  scan) was made.

The structural analysis was performed on an IRIS O2 computer using teXsan structure solving program system obtained from the Rigaku Corp., Tokyo, Japan.<sup>2</sup> Neutral scattering factors were obtained from the standard source.<sup>3</sup> In the reduction of data, Lorentz and polarization corrections were made. An empirical absorption correction was also made.<sup>4</sup>

The structures were solved by a combination of the direct methods (SHELXS56<sup>4</sup> or SAPI91 or SIR92 or MITHRIL90)<sup>5</sup> and Fourier synthesis (DIRDIF94).<sup>6</sup> Least-squares refinements were carried out using SHELXL-97<sup>4</sup> (refined on  $F^2$ ) linked to teXsan. All the non-hydrogen atoms were refined anisotropically. Unless otherwise stated riding refinements were applied to the methyl

hydrogen atoms [ $B(H) = B(C)$ ], and the other hydrogen atoms were fixed at the calculated positions. A part of disordered TfO anions and solvate molecules were fixed. Details of the refinements were as follows. **3, 9**: Hydrogen atoms attached to MeCN molecules were fixed. **4, 11<sup>Co</sup>, 14b**: All hydrogen atoms were fixed. **6**: The disordered TfO anion and hexane solvate were refined isotropically ( $S1O1-3 : S2O1a-3a: 0.59 : 0.41$ ;  $C91-93 : C91a-93a: 0.5 : 0.5$ ) and hydrogen atoms attached to the hexane solvate were not included in the refinement. **7**: The H0 atom included in hydrogen bonding was refined isotropically. **8**: Atoms C71,72, 81-86, C11,2,1A,2A and all hydrogen atoms were fixed. Two components ( $Cl1-Cl2 : Cl1a-Cl2a: 0.70 : 0.30$ ) were taken into account for one of the CH<sub>2</sub>Cl<sub>2</sub> solvates. The other atoms in the solvate molecules were refined isotropically and the hydrogen atoms attached to them were not included in the refinement. **10**: The disordered CH<sub>2</sub>Cl<sub>2</sub> solvate ( $Cl1-C50-Cl2 : Cl1A-C50A-Cl2A= 0.64 : 0.36$ ) was fixed at the final stage of the refinement. **11<sup>Ni</sup>**: The disordered TfO groups ( $0.5 : 0.5$ ) were refined isotropically. **14a**, Tp<sup>Ph,Me</sup>Co-OTf: The solvate molecules were refined isotropically and the attached hydrogen atoms were located at the calculated positions and not refined.

## References

- 1 T. Higashi, *Program for absorption correction*, Rigaku Corp., Tokyo, Japan, 1995.
- 2 *teXsan; Crystal Structure Analysis Package, ver. 1. 11*, Rigaku Corp., Tokyo, Japan, 2000.
- 3 *International Tables for X-ray Crystallography*; Kynoch Press, Birmingham, 1975, Vol. 4.
- 4 (a) G. M. Sheldrick, *SHELXS-86: Program for crystal structure determination*, University of Göttingen, Göttingen, Germany, 1986. (b) G. M. Sheldrick, *SHELXL-97: Program for crystal structure refinement*, University of Göttingen: Göttingen, Germany, 1997.
- 5 (a) SAPI91: H.-F. Fan, *Structure Analysis Programs with Intelligent Control*, Rigaku Corp., Tokyo, Japan, 1991. (b) SIR92: A. Altomare, M. C. Burla, M. Camalli, M. Cascarano, C. Giacovazzo, A. Guagliardi, and G. Polidori, *J. Appl. Cryst.*, 1994, **27**, 435. (c) MITHRIL90: C. J. Gilmore, *MITHRIL - an integrated direct methods computer program*, University of Glasgow, Glasgow, UK, 1990.
- 6 P. T. Beurskens, G. Admiraal, G. Beurskens, W. P. Bosman, S. Garcia-Granda, R. O. Gould, J. M. M. Smits, and C. Smykalla, *The DIRDIF program system, Technical Report of the Crystallography Laboratory*, University of Nijmegen, Nijmegen, The Netherlands, 1992.
